# Supplementary material for: Distinct Expression Patterns Of Causative Genes Responsible For Hereditary Progressive Hearing Loss In Non-Human Primate Cochlea
Source: PubMed Central journal article supplement (PMC4768099; doi:10.1038/srep22250), 2016-02-26
Supplement: srep22250-s1.pdf [file srep22250-s1.pdf]

# **Distinct Expression Patterns Of Causative Genes Responsible For Hereditary Progressive Hearing Loss In Non-Human Primate Cochlea**

**Makoto Hosoya<sup>1</sup>, Masato Fujioka<sup>1</sup>, Kaoru Ogawa<sup>1</sup>, and Hideyuki Okano<sup>2,\*</sup>**

1 Keio University School of Medicine, Department of Otorhinolaryngology, Head and Neck Surgery, 35

Shinanomachi Shinjyuku-ku Tokyo, 160-8582, Japan

2 Keio University School of Medicine, Department of Physiology, 35 Shinanomachi Shinjyuku-ku

Tokyo, 160-8582, Japan

[\\*hidokano@a2.keio.jp](mailto:hidokano@a2.keio.jp)

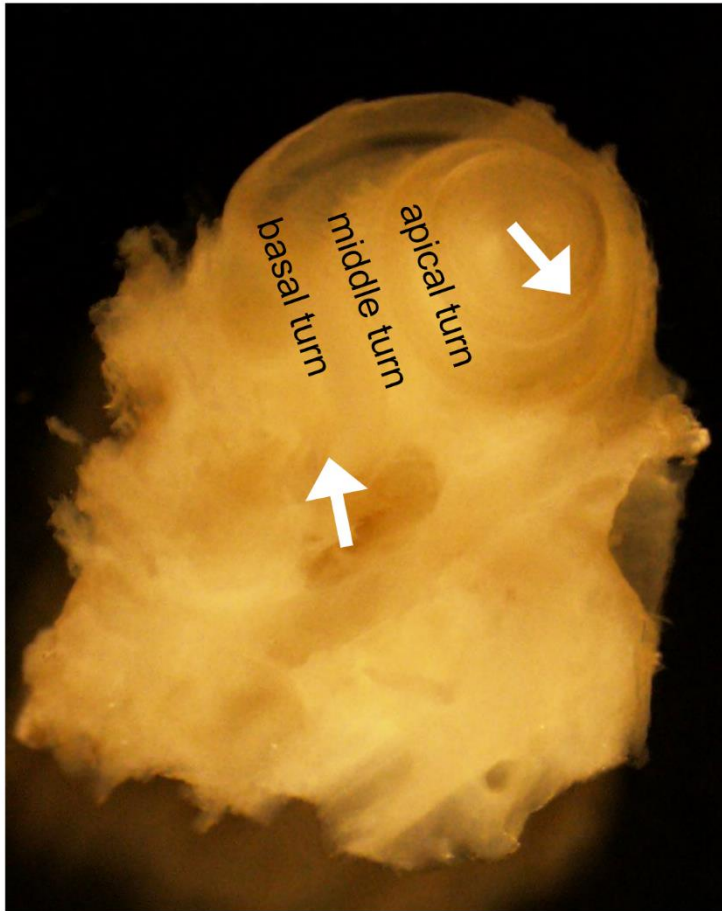

### Supplementary Figure S.1

#### **The common marmoset cochlea**

The common marmoset cochlea has 2 and 3/4 turns (between allows) with apical, middle and basal turns as similar to that of human. Note that the cochlear bone capsule was removed.

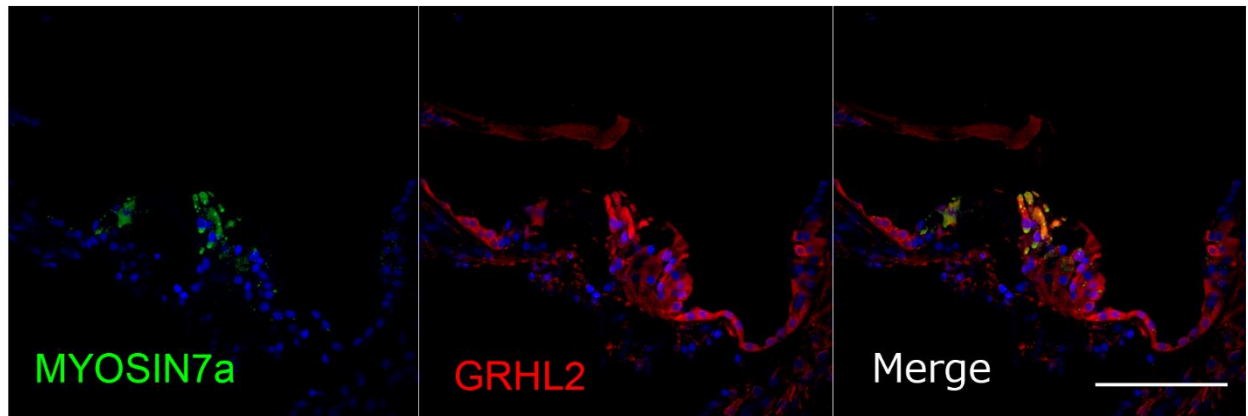

## Supplementary Figure. S2

### Cytoplasmic expression of GRHL2

Immunostaining for GRHL2 was observed in the nuclear and cytoplasm. We confirmed the localization by using two different antibodies. Like as shown in Fig.4 (using antibody from Sigma-Aldrich), the immunoreactivity was also detected in cytoplasm with another anti GRHL2 antibody from LSBio. The nuclei were counterstained with Hoechst (blue). Scale bar: 100  $\mu\text{m}$ .

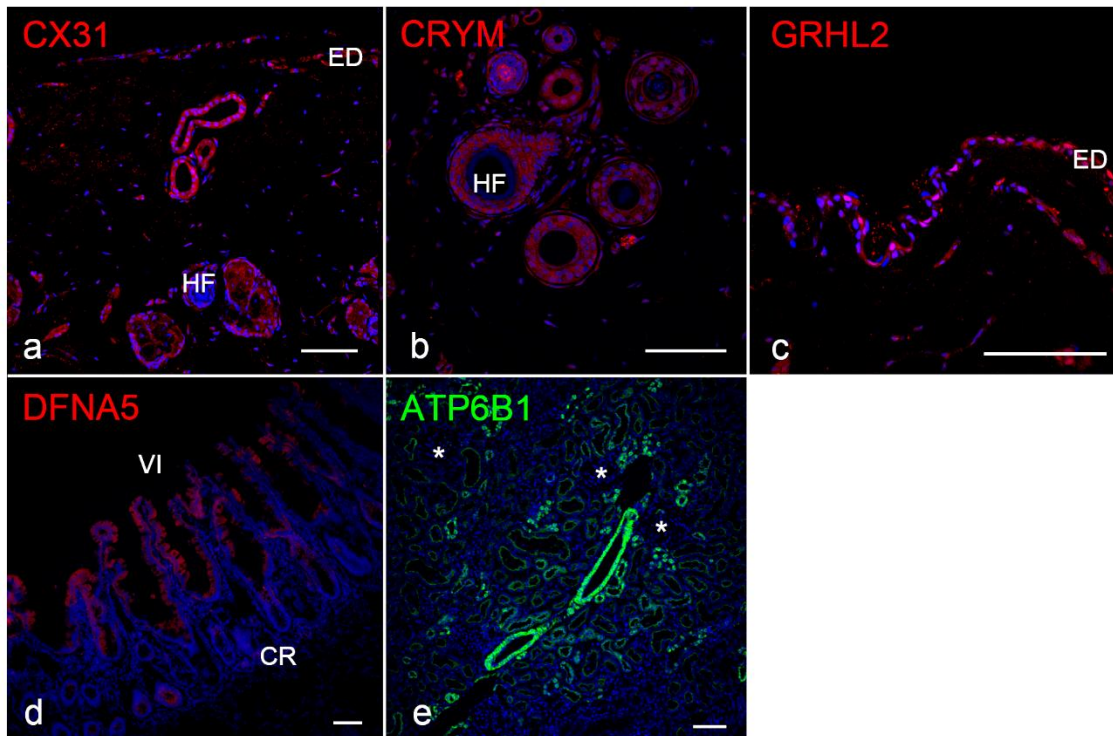

### Supplementary Figure. S3

#### Expressions of CX31, CRYM and GRHL2 in the skin, DFNA5 in the small intestine and ATP6B1 in the kidney

For validating antibodies specificities, we performed immunostaining of the skin, the small intestine and the kidney of common marmoset. (a-c) CX31, CRYM and GRHL2 immunoreactivities were detected in hair follicles (HF) or epidermal layers (ED) and not detected in surrounding connective tissues. (d) DFNA5 immunoreactivities were detected in villus (VI) and not detected in crypt (CR) of the small intestine. (e) ATP6B1 immunoreactivities were detected in collecting ducts and tubules and no immunoreactivities was detected in glomeruli (\*). The nuclei were counterstained with Hoechst (blue). Scale bar: 100  $\mu$ m.

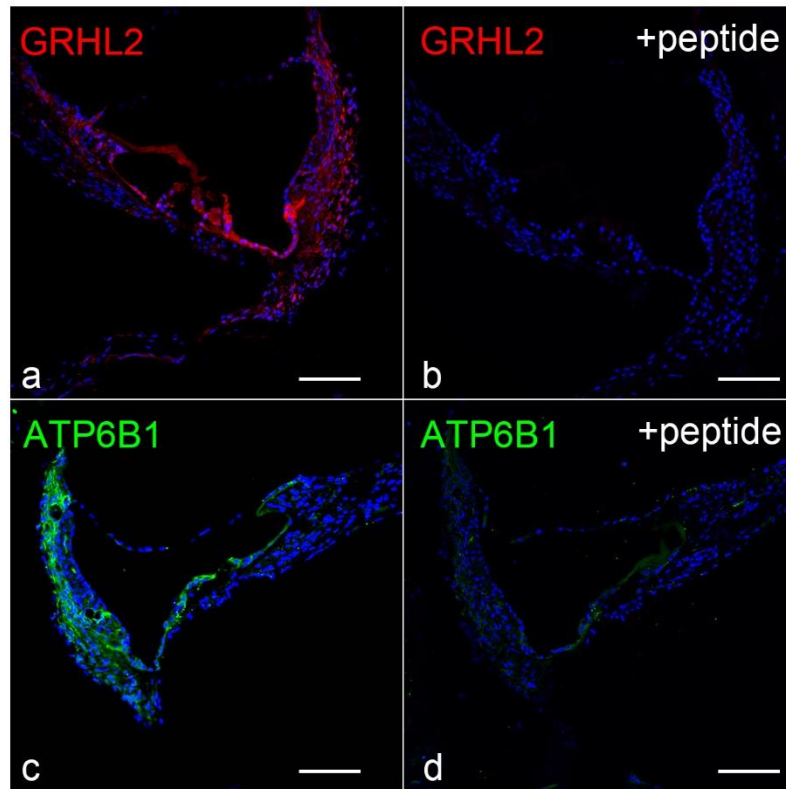

### Supplementary Figure. S4

#### Antibody absorption test by antigen peptide

For validating antibodies specificities, we performed antibody absorption test by antigen peptide. Immunoreactivities (a and c) were abolished by incubations with antigen peptide (b and d). The nuclei were counterstained with Hoechst (blue). Scale bar: 100  $\mu$ m.

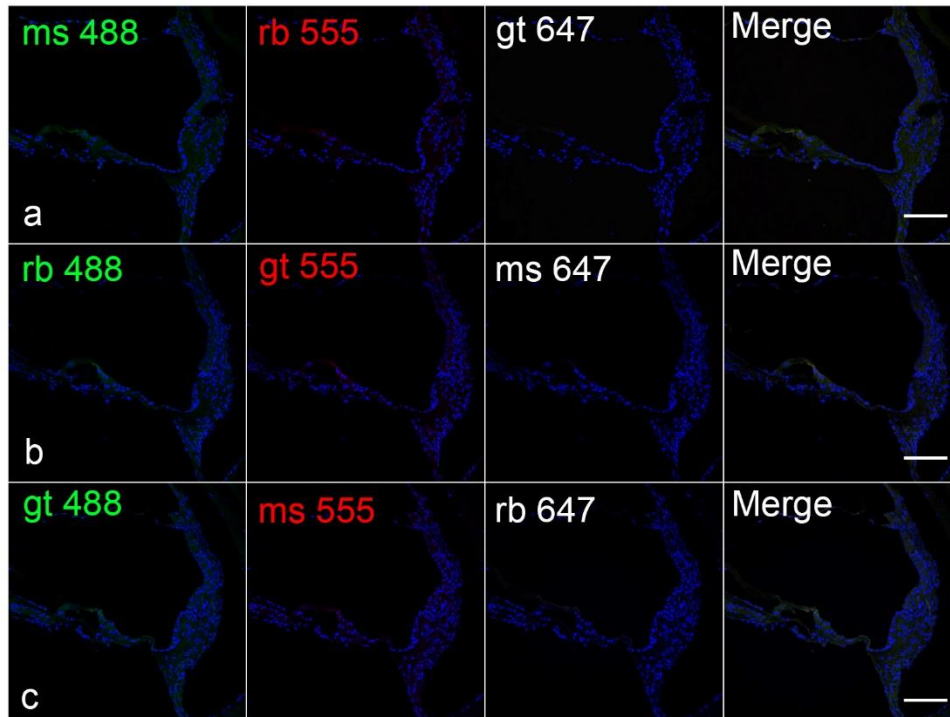

## Supplementary Figure. S5

### Validations of secondary antibodies.

For validating secondary antibodies' specificities, we performed immunostaining without primary antibody incubations. No immunoreactivities were observed. The nuclei were counterstained with Hoechst (blue). Scale bar: 100  $\mu$ m. ms: anti-mouse IgG rb: anti-rabbit Ig G gt: anti-goat IgG, 488: Alexa 488, 555: Alexa 555, 647: Alexa 647

# Supplementary Figure. S6

## a. CX31

*Homo sapiens* MDWKTLLQALLSGV NKYSTAFGR I WLSVVFVFWVLVYVVA AERVWGDEQKD 50  
*Callithrix jacchus* MDWKTLLQALLSGV NKYSTAFGR I WLSVVFVFRVLVYVVA AERVWGDEQKD 50  
*Mus musculus* MDWKRLQDLLSGV NQYSTAFGR I WLSVVFVFRVLVYVVA AERVWGDEQKD 50

*Homo sapiens* FDCNTKQPGCTNVCYDNYFPI SNI RLWALQLI FVTCPSLLVI LHVAYREE 100  
*Callithrix jacchus* FDCNTKQPGCTNVCYDNFFPI SNI RLWALQLI FVTCPSLLVI LHVAYREE 100  
*Mus musculus* FDCNTKQPGCTNVCYDNFFPI SNI RLWALQLI FVTCPSMLVI LHVAYREE 100

*Homo sapiens* RERRHRQKHGDQCAKLYDNAGKKHGGWLWWTYLFSLI FKLII EFLFLYLLH 150  
*Callithrix jacchus* RERRHRQKHGDQCSKLYDNAGKKHGGWLWWTYLFSLI FKLII EFLFLYLLH 150  
*Mus musculus* RERKHRQKHGEQCAKLYSHPGK HGGWLWWTYLFSLI FKLII EFLFLYLLH 150

*Homo sapiens* TLWHGFNMPRLVQC ANVAPCPNI VDCYI ARPTEKKI FTYF MVGASAVCI V 200  
*Callithrix jacchus* TLWHGFNMPRLVQC ANVAPCPNI VDCYI ARPTEKKI FTYF MVGASAVCI V 200  
*Mus musculus* TLWHGFTMPRLVQCA SIVPCPNFVDCYI ARPTEKKVFTYF MVGASAVCI I 200

*Homo sapiens* LTI CELCYLI CHRVLRLG LHKDKPRGGCSPSSS ASRASTCRCHHKLVEAGE 250  
*Callithrix jacchus* LTI CELCYLI CHRVLRLALR KDKPQGGHTPSSFASRASTCRCHHKLVEAGE 250  
*Mus musculus* LTI CEICYLI FHRMRGISK GKSTKSLSPKSSASRASTCRCHHKLLESGD 250

*Homo sapiens* VDPDPGNNKLGASAPNLTPI 270  
*Callithrix jacchus* LDPHPGNNKLGASAPNMTPI 270  
*Mus musculus* PEADPA SEKLGASAPSLTPI 270

## b. CRYM

*Homo sapiens* MSRVPAFLSAAEVEEHLRSS SLLI PPLETALANFSSGPEGGV MQPVRTVV 50  
*Callithrix jacchus* MSRVPAFLSAAEVEEHLRSS SLLI PPLETALANFSSGPEGGV MQPVRTVV 50  
*Mus musculus* MKRAPAFLSAE EVDHLRSS SLLI PPLEAALANFSSGPDGGVMQPVRTVV 50

*Homo sapiens* PVTKHRGYLGVM PAYSAAEDALTTKLVTFYEDRGI TSVVPSHQATVLLFE 100  
*Callithrix jacchus* PVTKHRGYLGVM PAYSAAEDALTTKLVTFYEDRGI TSVVPSHQATVLLFE 100  
*Mus musculus* PVAKHRGF LGVM PAYSAAEDALTTKLVTFYE GHSNTAVPSHQASVLLFD 99

*Homo sapiens* PSNGTLLAVMDGNVI TAKRTAAVSAI ATKFLKPPSSEVL CI LGAGVQAYS 150  
*Callithrix jacchus* PSNGTLLAVMDG SVI TAKRTAAVSAI ATKFLKPPSSEVL CI LGAGVQAYS 150  
*Mus musculus* PSNGSLLAVMDGNVI TAKRTAAVSAI ATKLLKPPGSDVLCI LGAGVQAYS 149

*Homo sapiens* HYEI FTEQFSFKEVRI WNRTKENAEKFADTVQGEVRVCSSVQEAVAGADV 200  
*Callithrix jacchus* HYEI FTEQFSFKEVRI WNRTKENAEKFADTVQGEVRVCSSVQEAVT GADV 200  
*Mus musculus* HYEI FTEQFSFKEVRMWNRTRENAEKFASTVQGDVVRVCSSVQEAVT GADV 199

*Homo sapiens* IITVTLATEPI LFG EWVKPGAHI NAVGASRPDWRELDDEL MKEAVLYVDS 250  
*Callithrix jacchus* IITVTLATEPI LFG EWVKPGAHI NAVGASRPDWRELDDEL MKEAVLYVDS 250  
*Mus musculus* IITVTMATEPI LFG EWVKPGAHI NAVGASRPDWRELDDEL MRGAVLYVDS 249

*Homo sapiens* QEAALKESGDVLLS GAEIFAELGEVI KGVKPAHCEKTTVFKSLGMAVEDT 300  
*Callithrix jacchus* QEAALKESGDVLLS GAEIFAELGEVI KGVKPAHCEKTTVFKSLGMAVEDT 300  
*Mus musculus* REAALKESGDVLLS GAEIFAELGEVI S GAKPAHCEKTTVFKSLGMAVEDL 299

*Homo sapiens* VAAKLIYDSWSSGK 314  
*Callithrix jacchus* VAAKLIYDSWSSGK 314  
*Mus musculus* VAAKLYYDSWSSGK 313

## c. GRHL2

|                           |                                                                                                     |     |
|---------------------------|-----------------------------------------------------------------------------------------------------|-----|
| <i>Homo sapiens</i>       | T L E A T K S L R Q K Q G E G P M T Y L N K G Q F Y A I T L S E T G D N K C F R H P I S K V R S V V | 300 |
| <i>Callithrix jacchus</i> | T L E A T K S L R Q K Q G E G P M T Y L N K G Q F Y A I T L S E T G D N K C F R H P I S K V R S V V | 300 |
| <i>Mus musculus</i>       | T L E A T K S L R Q K Q G E G P M T Y L N K G Q F Y A I T L S E T G D N K C F R H P I S K V R S V V | 300 |
| <hr/>                     |                                                                                                     |     |
| <i>Homo sapiens</i>       | M V V F S E D K N R D E Q L K Y W K Y W H S R Q H T A K Q R V L D I A D Y K E S F N T I G N I E E I | 350 |
| <i>Callithrix jacchus</i> | M V V F S E D K N R D E Q L K Y W K Y W H S R Q H T A K Q R V L D I A D Y K E S F N T I G N I E E I | 350 |
| <i>Mus musculus</i>       | M V V F S E D K N R D E Q L K Y W K Y W H S R Q H T A K Q R V L D I A D Y K E S F N T I G N I E E I | 350 |
| <hr/>                     |                                                                                                     |     |
| <i>Homo sapiens</i>       | A Y N A V S F T W D V N E E A K I F I T V N C L S T D F S S Q K G V K G L P L M I Q I D T Y S Y N N | 400 |
| <i>Callithrix jacchus</i> | A Y N A V S F T W D V N E E A K I F I T V N C L S T D F S S Q K G V K G L P L M I Q I D T Y S Y N N | 400 |
| <i>Mus musculus</i>       | A Y N A V S F T W D V N E E A K I F I T V N C L S T D F S S Q K G V K G L P L M I Q I D T Y S Y N N | 400 |
| <hr/>                     |                                                                                                     |     |
| <i>Homo sapiens</i>       | R S N K P I H R A Y C Q I K V F C D K G A E R K I R D E E R K Q N R K K G K G Q A S Q T Q C N S S S | 450 |
| <i>Callithrix jacchus</i> | R S N K P I H R A Y C Q I K V F C D K G A E R K I R D E E R K Q N R K K G K G Q T S Q T Q C N S S S | 450 |
| <i>Mus musculus</i>       | R S N K P I H R A Y C Q I K V F C D K G A E R K I R D E E R K Q N R K K G K G Q A S Q A Q C N S S   | 450 |
| <hr/>                     |                                                                                                     |     |
| <i>Homo sapiens</i>       | D G K L A A I P L Q K K S D I T Y F K T M P D L H S Q P V L F I P D V H F A N L Q R T G Q V Y Y N T | 500 |
| <i>Callithrix jacchus</i> | D G K L A A I P L Q K K S D I T Y F K T M P D L H S Q P V L F I P D V H F A N L Q R T G Q V Y Y N T | 500 |
| <i>Mus musculus</i>       | D G K M A A I P L Q K K S D I T Y F K T M P D L H S Q P V L F I P D V H F A N L Q R T G Q V Y Y N T | 500 |
| <hr/>                     |                                                                                                     |     |
| <i>Homo sapiens</i>       | D D E R E G G S V L V K R M F R P M E E E F G P V P S K Q M K E E G T K R V L L Y V R K E T D D V F | 550 |
| <i>Callithrix jacchus</i> | D D E R E G S V L V K R M F R P M E E E F G P V P S K Q M K E E G T K R V L L Y V R K E T D D V F   | 549 |
| <i>Mus musculus</i>       | D D E R E G S S V L V K R M F R P M E E E F G P T P S K Q T K E E N V K R V L L Y V R K E N D D V F | 550 |
| <hr/>                     |                                                                                                     |     |
| <i>Homo sapiens</i>       | D A L M L K S P T V K G L M E A I S E K Y G L P V E K I A K L Y K K S K K G I L V N M D D N I I E H | 600 |
| <i>Callithrix jacchus</i> | D A L M L K S P T V K G L M E A I S E K Y G L P V E K I A K L Y K K S K K G I L V N M D D N I I E H | 599 |
| <i>Mus musculus</i>       | D A L M L K S P T V K G L M E A T S E K Y G L P V E K I T K L Y K K S K K G I L V N M D D N I I E H | 600 |
| <hr/>                     |                                                                                                     |     |
| <i>Homo sapiens</i>       | Y S N E D T F I L N M E S M V E G F K V T L M E I                                                   | 625 |
| <i>Callithrix jacchus</i> | Y S N E D T F I L N M E S M V E G F K V T L M E I                                                   | 624 |
| <i>Mus musculus</i>       | Y S N E D T F I L N M E S M V E G F K T T L M E I                                                   | 625 |



## d. DFNA5

|                           |                                                                                                     |     |
|---------------------------|-----------------------------------------------------------------------------------------------------|-----|
| <i>Homo sapiens</i>       | MFAKATRNFLREVDADGDLI AVSNLNDSDKLQLLSLVTKKKRFWCWQRPK                                                 | 50  |
| <i>Callithrix jacchus</i> | MFAKATK NFLREVDADGDLI AVSNLNDSDKLQLLSLVTKKKRFWCWQRPK                                                | 50  |
| <i>Mus musculus</i>       | MFAKATRNFLKEVDA GGDLI S VSHLNDSDKLQLLSLVTKKKR YWCWQRPK                                              | 50  |
| <i>Homo sapiens</i>       | YQFLSLTLGDVLI EDQFPSPVVVESDFVKYEGKFANHVS GTLETALGKVK                                                | 100 |
| <i>Callithrix jacchus</i> | YQFLS I TLGDVL K EDQFPSPVVVESDFVKY ESKFANHVS GTL D TALGKVK                                          | 100 |
| <i>Mus musculus</i>       | Y Q T L S A T L E D V L T E G H C L S P V V E S D F V K Y E S K C E N H K S G A I G T V V G K V K   | 100 |
| <i>Homo sapiens</i>       | LNLGGSSRVESQSSF GTLRKQEV DLQQLI RDSAERTI NLRNPVLQQVLE G                                             | 150 |
| <i>Callithrix jacchus</i> | L N V G G S S R V E S Q S S F G T L R K Q E V D L Q Q L I R D S A E R T I N L R N P V L Q Q V L E E | 150 |
| <i>Mus musculus</i>       | L N V G G K G V V E S H S S F G T L R K Q E V D V Q Q L I Q D A V K R T V N M D N L V L Q Q V L E S | 150 |
| <i>Homo sapiens</i>       | RNEVLCVLTQKI ITTMQKCVI SEHMQVVEEKCGGIVG IQTKTVQVSATEDGN                                             | 200 |
| <i>Callithrix jacchus</i> | RNEVLCVLTQKI ITTMQKCVI SEH T QVVEEKCGG M VGIQTKTVQVSATEDGN                                          | 200 |
| <i>Mus musculus</i>       | RNEVLCVLTQKI M T QKCVI SEH V Q S E E T C G G M V G I Q T K T I Q V S A T E D G T                    | 200 |
| <i>Homo sapiens</i>       | VTKDSNVVLEIPAATTIAYGVIELYVKLDGLF EFCLLRGKQG GFENKKRI                                                | 250 |
| <i>Callithrix jacchus</i> | V M K D S N V V L E I P A A T T I A Y G V I E L Y V K L D G H F E F C L L Q G K E S G F E N K R R I | 250 |
| <i>Mus musculus</i>       | V T T D T N V V L E I P A A T T I A Y G T M E L F V K G D G Q F E F C L L Q G K H G G F E H E R K L | 250 |
| <i>Homo sapiens</i>       | DSVYLDHLVFRFAFIDMPDA AHGISSQDGPLSVLKQATLL LERNFHPFA                                                 | 300 |
| <i>Callithrix jacchus</i> | DSVYLD P L A F R E F A F I D M P D A G H G I S S Q D G P L S V L K Q A T P L L E R N F H P F V      | 300 |
| <i>Mus musculus</i>       | D S V Y L D P L A Y R E F A F I D M P D G G G I S S Q D G P L R V V K Q A T L H L E R S F H P F A   | 300 |
| <i>Homo sapiens</i>       | ELPEPQQTALSDFQAVVFDDELLMVLEPV CDDLVSGLSPTVA VLG--EL                                                 | 348 |
| <i>Callithrix jacchus</i> | ELPEPQQTALSDFQAVLFDN ELLMVLEPV CDDV V S G L S P P L V V L G -- E L                                  | 348 |
| <i>Mus musculus</i>       | V L P A Q Q R A L F C V I Q K I L F D E E L L R A L E Q V C D D V A G G L W S S Q A V L A M E E L   | 350 |
| <i>Homo sapiens</i>       | KPRQQQDLVAFQLVGC SLQGCGPPE DAGSKQ-LFMTAYFLVSALAEMP                                                  | 397 |
| <i>Callithrix jacchus</i> | M P R Q Q Q D V M A F L Q L V G C S L Q G E R P G P E D A G S K R - L F T T A Y F L V S A L A E M P | 397 |
| <i>Mus musculus</i>       | T D S Q Q Q D L T A F L Q L V G Y R I Q G E H P G P G D E V S N Q K L F A T A Y F L V S A L A E M P | 400 |
| <i>Homo sapiens</i>       | DSAAALLGTCKLQI IPTLCHLLRALSDDGVSDLEDPTLT PLK DTERFGI                                                | 447 |
| <i>Callithrix jacchus</i> | D N A A A L L G T C Y K L Q I I P T L C H L L R A L S D D G V S D L E D P T L A P L K D T E R F G I | 447 |
| <i>Mus musculus</i>       | D N A T V F L G T C C K L H V I S S L C G L L H A L S D D S V C D F H N P T L A P L R D T E R F G I | 450 |
| <i>Homo sapiens</i>       | VQRLFASADISLERLKSSVKAVILKDSKVFP LLLCITLNGLCALGREHS-                                                 | 496 |
| <i>Callithrix jacchus</i> | VQRLFASADI T L E R L K S S V K A V I L K D S E I F P L L L C I T L N G L C A L G R E H S -          | 496 |
| <i>Mus musculus</i>       | VQRLFASADI A L E R M Q F S A K A T I L K D S C I F P L I L H I T L S G L S T L S K E H E E          | 500 |
| <i>Homo sapiens</i>       | -----                                                                                               |     |
| <i>Callithrix jacchus</i> | -----                                                                                               |     |
| <i>Mus musculus</i>       | E L C Q S G H A T G Q D                                                                             | 512 |

## e. ATP6B1

|                           |                                                                                                                                        |     |
|---------------------------|----------------------------------------------------------------------------------------------------------------------------------------|-----|
| <i>Homo sapiens</i>       | M A M E I D S R P G G L P G S S C N L G A A R E H M Q A V T R N Y I T H P R V T Y R T V C S V N G P                                    | 50  |
| <i>Callithrix jacchus</i> | M A M E I D S R P G G L P G S <b>G</b> F K L G A A R E H M Q A V T R N Y I T H P R V T Y R T V C S V N G P                             | 50  |
| <i>Mus musculus</i>       | M A <b>T</b> T V D S R <b>S</b> S G F T <b>G</b> N S C D P G T A <b>G</b> E H <b>V</b> Q A V T R N Y I T H P R V T Y R T V C S V N G P | 50  |
| <i>Homo sapiens</i>       | L V V L D R V K F A Q Y A E I V H F T L P D G T Q R S G Q V L E V A G T K A I V Q V F E G T S G I D                                    | 100 |
| <i>Callithrix jacchus</i> | L V V L D <b>Q</b> V K F A Q Y A E I V H F T L P D G T Q R S G Q V L E V A G T K A <b>V</b> V Q V F E G T S G I D                      | 100 |
| <i>Mus musculus</i>       | L V V L D <b>G</b> V K F A Q Y A E I V <b>N</b> F T L P D G T Q R S G Q V L E V A G T K A I V Q V F E G T S G I D                      | 100 |
| <i>Homo sapiens</i>       | A R K T T C E F T G D I L R T P V S E D M L G R V F N G S G K P I D K G P V V M A E D F L D I N G Q                                    | 150 |
| <i>Callithrix jacchus</i> | A R K T T C E F T G D I L R T P V S E D M L G R V F N G S G K P I D K G P V V M A E D F L D I N G Q                                    | 150 |
| <i>Mus musculus</i>       | <b>S</b> Q K T T C E F T G D I L R T P V S E D M L G R <b>I</b> F N G S G K P I D K G P <b>A</b> V M A E <b>E</b> F L D I N G Q        | 150 |
| <i>Homo sapiens</i>       | P I N P H S R I Y P E E M I Q T G I S P I D V M N S I A R G Q K I P I F S A A G L P H N E I A A Q I                                    | 200 |
| <i>Callithrix jacchus</i> | P I N P H S R I Y P E E M I Q T G I S P I D V M N S I A R G Q K I P I F S A A G L P H N E I A A Q I                                    | 200 |
| <i>Mus musculus</i>       | P I N P H <b>G</b> R I Y P E E M I Q T G I S P I D V M N S I A R G Q K I P I F S A A G L P H N E I A A Q I                             | 200 |
| <i>Homo sapiens</i>       | C R Q A G L V K K S K A V L D Y H D D N F A I V F A A M G V N M E T A R F F K S D F E Q N G T M G N                                    | 250 |
| <i>Callithrix jacchus</i> | C R Q A G L V K K S K A V L D Y H D D N F A I V F A A M G V N M E T A R F F K S D F E Q N G T M G N                                    | 250 |
| <i>Mus musculus</i>       | C R Q A G L V K K S K A V L D Y <b>H</b> E D N F A I V F A A M G V N M E T A R F F K S D F E Q N G T M G N                             | 250 |
| <i>Homo sapiens</i>       | V C L F L N L A N D P T I E R I I T P R L A L T T A E F L A Y Q C E K H V L V I L T D M S S Y A E A                                    | 300 |
| <i>Callithrix jacchus</i> | V C L F L N L A N D P T I E R I I T P R L A L T T A E F L A Y Q C E K H V L V I L T D M S S Y A E A                                    | 300 |
| <i>Mus musculus</i>       | V C L F L N L A N D P T I E R I I T P R L A L T T A E F L A Y Q C E K H V L V I L T D M S S Y A E A                                    | 300 |
| <i>Homo sapiens</i>       | L R E V S A A R E E V P G R R G F P G Y M Y T D L A T I Y E R A G R V E G R G G S I T Q I P I L T M                                    | 350 |
| <i>Callithrix jacchus</i> | L R E V S A A R E E V P G R R G F P G Y M Y T D L A T I Y E R A G R V E G R G G S I T Q I P I L T M                                    | 350 |
| <i>Mus musculus</i>       | L R E V S A A R E E V P G R R G F P G Y M Y T D L A T I Y E R A G R V E G R G G S I T Q I P I L T M                                    | 350 |
| <i>Homo sapiens</i>       | P N D D I T H P I P D L T G F I T E G Q I Y V D R Q L H N R Q I Y P P I N V L P S L S R L M K S A I                                    | 400 |
| <i>Callithrix jacchus</i> | P N D D I T H P I P D L T G F I T E G Q I Y V D R Q L H N R Q I Y P P I N V L P S L S R L M K S A I                                    | 400 |
| <i>Mus musculus</i>       | P N D D I T H P I P D L T G F I T E G Q I Y V D R Q L H N R Q <b>V</b> Y P P I N V L P S L S R L M K S A I                             | 400 |
| <i>Homo sapiens</i>       | G E G M T R K D H G D V S N Q L Y A C Y A I G K D V Q A M K A V V G E E A L T S E D L L Y L E F L Q                                    | 450 |
| <i>Callithrix jacchus</i> | G E G M T R K D H G D V S N Q L Y A C Y A I G K D V Q A M K A V V G E E A L T S E D L L Y L E F L Q                                    | 450 |
| <i>Mus musculus</i>       | G E G M T R K D H G D V S N Q L Y A C Y A I G K D V Q A M K A V V G E E A L T S E D L L Y L E F L Q                                    | 450 |
| <i>Homo sapiens</i>       | K F E K N F I N Q G P Y E N R S V F E S L D L G W K L L R I F P K E M L K R I P Q A V I D E F Y S R                                    | 500 |
| <i>Callithrix jacchus</i> | K F E K N F I N Q G P Y E N R S V F E S L D L G W K L L R I F P K E M L K R I P Q A <b>M</b> I D E F Y S R                             | 500 |
| <i>Mus musculus</i>       | K F E K N F I <b>T</b> Q G P Y E N R <b>T</b> V F E S L D L G W K L L R I F P K E M L K R I P Q <b>S</b> M <b>T</b> D E F Y S R        | 500 |
| <i>Homo sapiens</i>       | E G A L Q D L A P D T A L                                                                                                              | 513 |
| <i>Callithrix jacchus</i> | E G A P Q D P A P D T A L                                                                                                              | 513 |
| <i>Mus musculus</i>       | <b>Q</b> G A <b>Q</b> Q D <b>P</b> A <b>S</b> D T A L                                                                                  | 513 |

## f. COCH

|                           |                                                      |     |
|---------------------------|------------------------------------------------------|-----|
| <i>Homo sapiens</i>       | MSAAWIPALGLGVCLLLLPGP--AGSEGAAPIAITCFTTRGLDIRKEKADV  | 48  |
| <i>Callithrix jacchus</i> | MSAAWIQTFLFLGVCLQLLPGP--MGSEGAAPIAITCFTTRGLDIRKEKADV | 48  |
| <i>Mus musculus</i>       | MPSSRIPALGLGAWLLLLLLPFRFAEAIVPIPVITCFTTRGLDIRKEKADV  | 50  |
| <i>Homo sapiens</i>       | LCPGGCPLEEFVSYGNIVYASVSSICGAAVHRGVISNSGGPVRVYSLPGR   | 98  |
| <i>Callithrix jacchus</i> | LCPGGCPLEEFVSYGNIVYASVSSICGAAVHRGVISNSGGPVRVYSLPGR   | 98  |
| <i>Mus musculus</i>       | LCPGGCSLEEFVSYFGNIVYASVSSICGAAVHRGVIGTISGGPVRVYSLPGR | 100 |
| <i>Homo sapiens</i>       | ENYSSVDANGIQSQMLSRWSASFVTVKGKSSTQEATGQAVSTAHPPTGKR   | 148 |
| <i>Callithrix jacchus</i> | ENYSSVDANGIQSQMLSRWSASFVTVKGKSSTQEATGQAVSTAHPPTGKR   | 148 |
| <i>Mus musculus</i>       | ENYSSVDANGIQSQMLSRWSASFAVTKGKSSTQEATGRAVSTAHPPTSGKR  | 150 |
| <i>Homo sapiens</i>       | LKKTPEKKTGNKDCKADIAFLIDGGSFNIGQRRFNLQKNFVGKVALMLGIG  | 198 |
| <i>Callithrix jacchus</i> | LKKTPEKKTGNKDCKADIAFLIDGGSFNIGQRRFNLQKNFVGKVALMLGIG  | 198 |
| <i>Mus musculus</i>       | LKKTPEKKTGNKDCKADIAFLIDGGSFNIGQRRFNLQKNFVGKVALMLGIG  | 200 |
| <i>Homo sapiens</i>       | TEGPHVGLVQASEHPKIEFYLNFTSAKDVLFAIKEVGFRRGNSNTGKAL    | 248 |
| <i>Callithrix jacchus</i> | TEGPHVGLVQASEHPKIEFYLNFTSAKDVLFAIKEVGFRRGNSNTGKAL    | 248 |
| <i>Mus musculus</i>       | TEGPHVGLVQASEHPKIEFYLNFTSAKDVLFAIKEVGFRRGNSNTGKAL    | 250 |
| <i>Homo sapiens</i>       | KHTAQKFFTVDAGVRKGIKVVVVVIDGWPSDDIEEAGIVAREFGVNVFI    | 298 |
| <i>Callithrix jacchus</i> | KHTAQKFFTVDAGVRKGIKVVVVVIDGWPSDDIEEAGIVAREFGVNVFI    | 298 |
| <i>Mus musculus</i>       | KHTAQKFFTADTGVVRKGIKVVVVVIDGWPSDDIEEAGIVAREFGVNVFI   | 300 |
| <i>Homo sapiens</i>       | VSVAKPIPEELGMVQDVTFVDKAVCRNNGFFSYHMPNWFQTTKYVKPLVQ   | 348 |
| <i>Callithrix jacchus</i> | VSVAKPIPEELGMVQDVSFVDKAVCRNNGFFSYHMPNWFQTTKYVKPLVQ   | 348 |
| <i>Mus musculus</i>       | VSVAKPIPEELGMVQDVAFVDKAVCRNNGFFSYHMPNWFQTTKYVKPLVQ   | 350 |
| <i>Homo sapiens</i>       | KLCTHEQMMCSKTCYNSVNI AFLIDGSSSVGDSNFRMLLEFVSNI AKTFE | 398 |
| <i>Callithrix jacchus</i> | KLCTHEQMMCSKTCYNSVNI AFLIDGSSSVGDSNFRMLLEFVSNI AKTFE | 398 |
| <i>Mus musculus</i>       | KLCTHEQMMCSKTCYNSVNI AFLIDGSSSVGDSNFRMLLEFVSNI AKTFE | 400 |
| <i>Homo sapiens</i>       | ISDIGAKIAAVQFTYDQRTEFSFTDYSTKENVLAVIRNIRYMSGGTATGD   | 448 |
| <i>Callithrix jacchus</i> | ISDIGAKIAAVQFTYDQRM EFSFTDYNTKENVLAVIRNIRYMSGGTATGD  | 448 |
| <i>Mus musculus</i>       | ISDIGAKIAAVQFTYDQRTEFSFTDYNTKENVLAVLANIRYMSGGTATGD   | 450 |
| <i>Homo sapiens</i>       | AISFTVRNVFGPIRES PNKNFLVIVTDGQSYDDVQGPAAAAHDAGITIFS  | 498 |
| <i>Callithrix jacchus</i> | AISFTVRNVFGPIRES PNKNFLVIVTDGQSYDDVQGPAAAAHDAGITIFS  | 498 |
| <i>Mus musculus</i>       | AIAFTVRNVFGPIRES PNKNFLVIVTDGQSYDDVRGPAAAAHDAGITIFS  | 500 |
| <i>Homo sapiens</i>       | VGVAWAPLDDLKDMASKPKESHAFFTREFTGLEPIVSDVIRGICRDFLES   | 548 |
| <i>Callithrix jacchus</i> | VGVAWAPLDDLKDMASKPKESHAFFTREFTGLEPIVSDVIRGICRDFLES   | 548 |
| <i>Mus musculus</i>       | VGVAWAPLDDL RDMASKPKESHAFFTREFTGLEPIVSDVIRGICRDFLES  | 550 |
| <i>Homo sapiens</i>       | Q Q                                                  | 550 |
| <i>Callithrix jacchus</i> | Q Q                                                  | 550 |
| <i>Mus musculus</i>       | Q Q                                                  | 552 |

**Comparisons of amino-acid sequences between human (*Homo sapience*), common marmoset (*Callithrix jaccus*) and mouse (*Mus musculus*)**

We compared amino-acid sequences of these three animals and we showed in these six deafness genes amino-acid sequences of common marmoset is more similar to human than mouse. (a) Homology of amino-acid sequences of CX31 was shown. Human vs common marmoset: 95.19%, human vs mouse 82.22% (b) Homology of amino-acid sequences of CRYM was shown. Human vs common marmoset: 99.04%, human vs mouse 88.50% (c) Homology of amino-acid sequences of GRHL2 was shown. Human vs common marmoset: 98.88%, human vs mouse 94.72% (d) Homology of amino-acid sequences of DFNA5 was shown. Human vs common marmoset: 92.14%, human vs mouse 71.37% (e) Homology of amino-acid sequences of ATP6B1 was shown. Human vs common marmoset: 98.44%, human vs mouse 94.72% (f) Homology of amino-acid sequences of COCH was shown. Human vs common marmoset: 98.55%, human vs mouse 93.45%

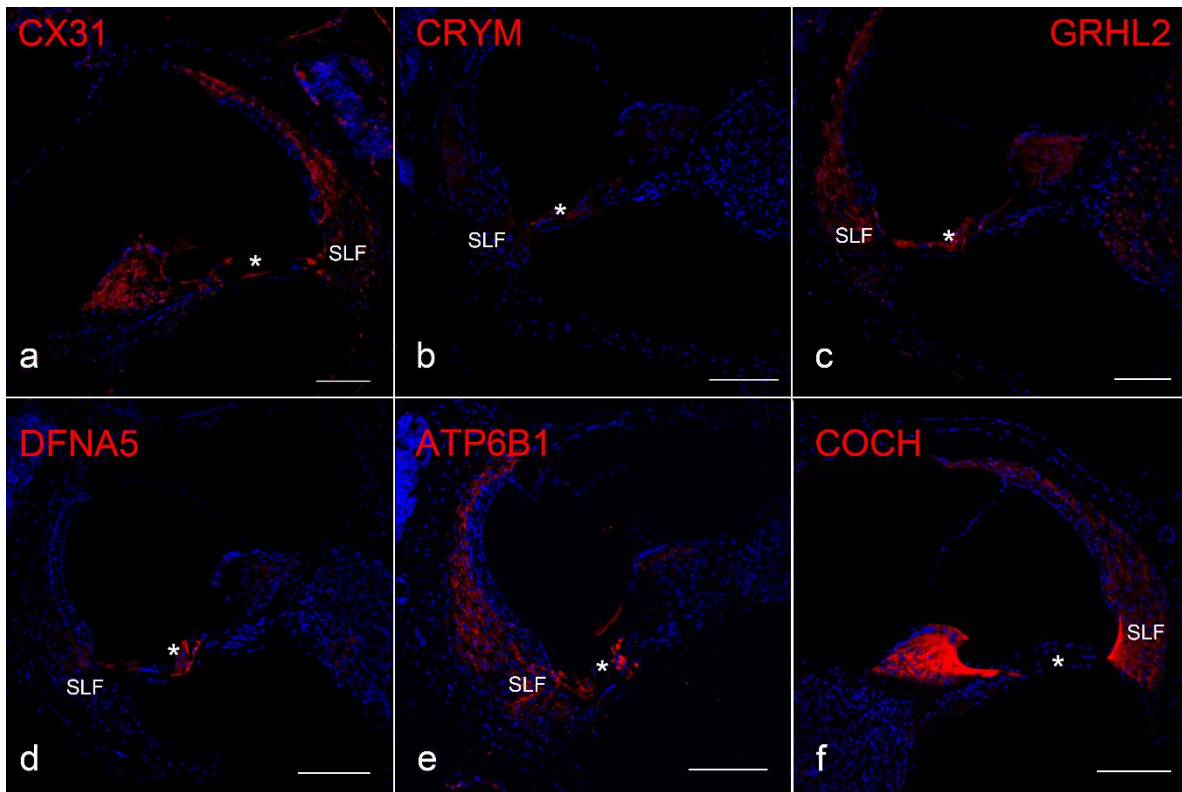

### Supplementary Figure. S7

#### Immunostaining of mouse specimens.

(a) Anti-CX31 antibody recapitulated previous report and strong immunoreactivities were detected in the spiral ligament fibrocytes of mouse and no immunoreactivities was detected in the organ of Corti. (b) Anti-CRYM antibody did not work well against mouse specimens. (c) Anti-GRHL2 antibody used in this report partially recapitulated previous report and immunoreactivities were detected in the organ of Corti. (d) Anti-DFNA5 antibody used in this report partially recapitulated previous report and immunoreactivities were detected in the organ of Corti. (e) Anti-ATP6B1 antibody recapitulated previous report and strong immunoreactivities were detected in the spiral ligament fibrocytes of mouse. (f) Anti-COCH antibody recapitulated previous report and strong immunoreactivities were detected in the spiral ligament fibrocytes of mouse and no immunoreactivities was detected in the organ of Corti. SLF: Spiral Ligament Fibrocytes, \*. Organ of Corti. The nuclei were counterstained with Hoechst (blue). Scale bar: 100  $\mu$ m.
